# Supplementary material
Source: ML conference proceedings conference paper supplement (https://openaccess.thecvf.com/content/ICCV_2019/html/de_Lutio_Guided_Super-Resolution_As_ICCV_2019_paper.html)
Supplement: Supplementary file 1 [file de_Lutio_Guided_Super-Resolution_As_ICCV_2019_supplemental.pdf]

## Additional Results

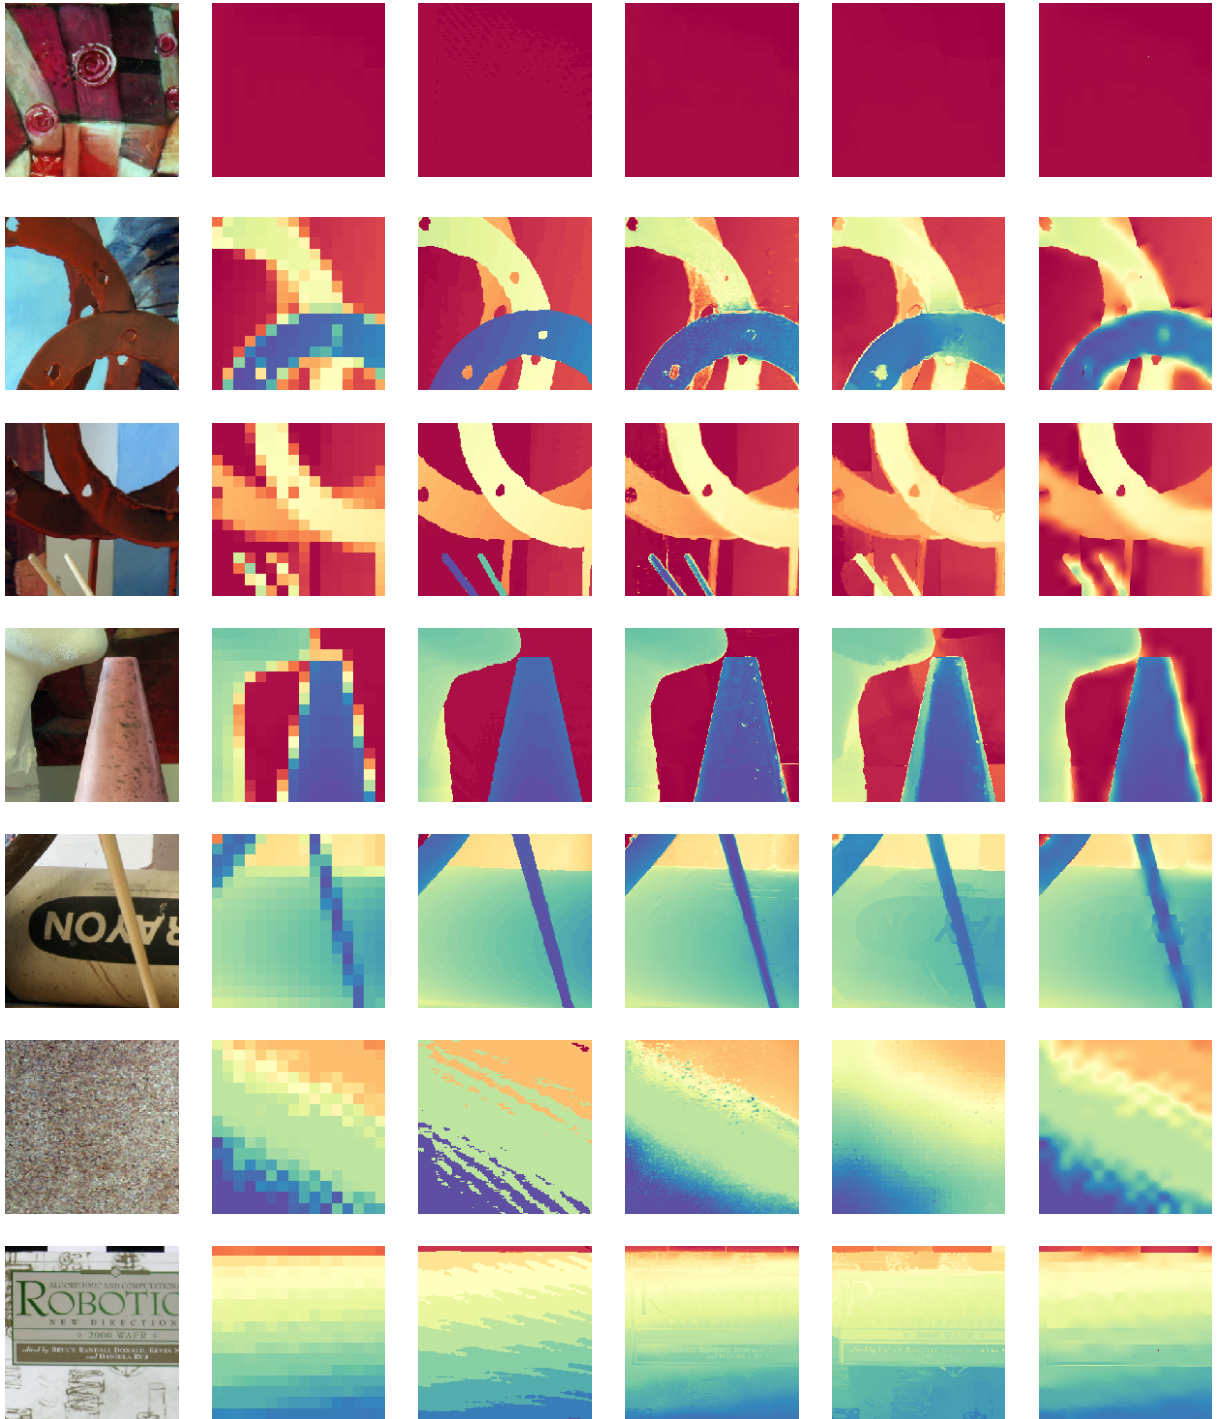

Figure 1: Additional results for the depth guided super-resolution (upsampling factor  $\times 16$ ). From left to right: guide image, source image, target image, our prediction, the FBS and the SD filter.

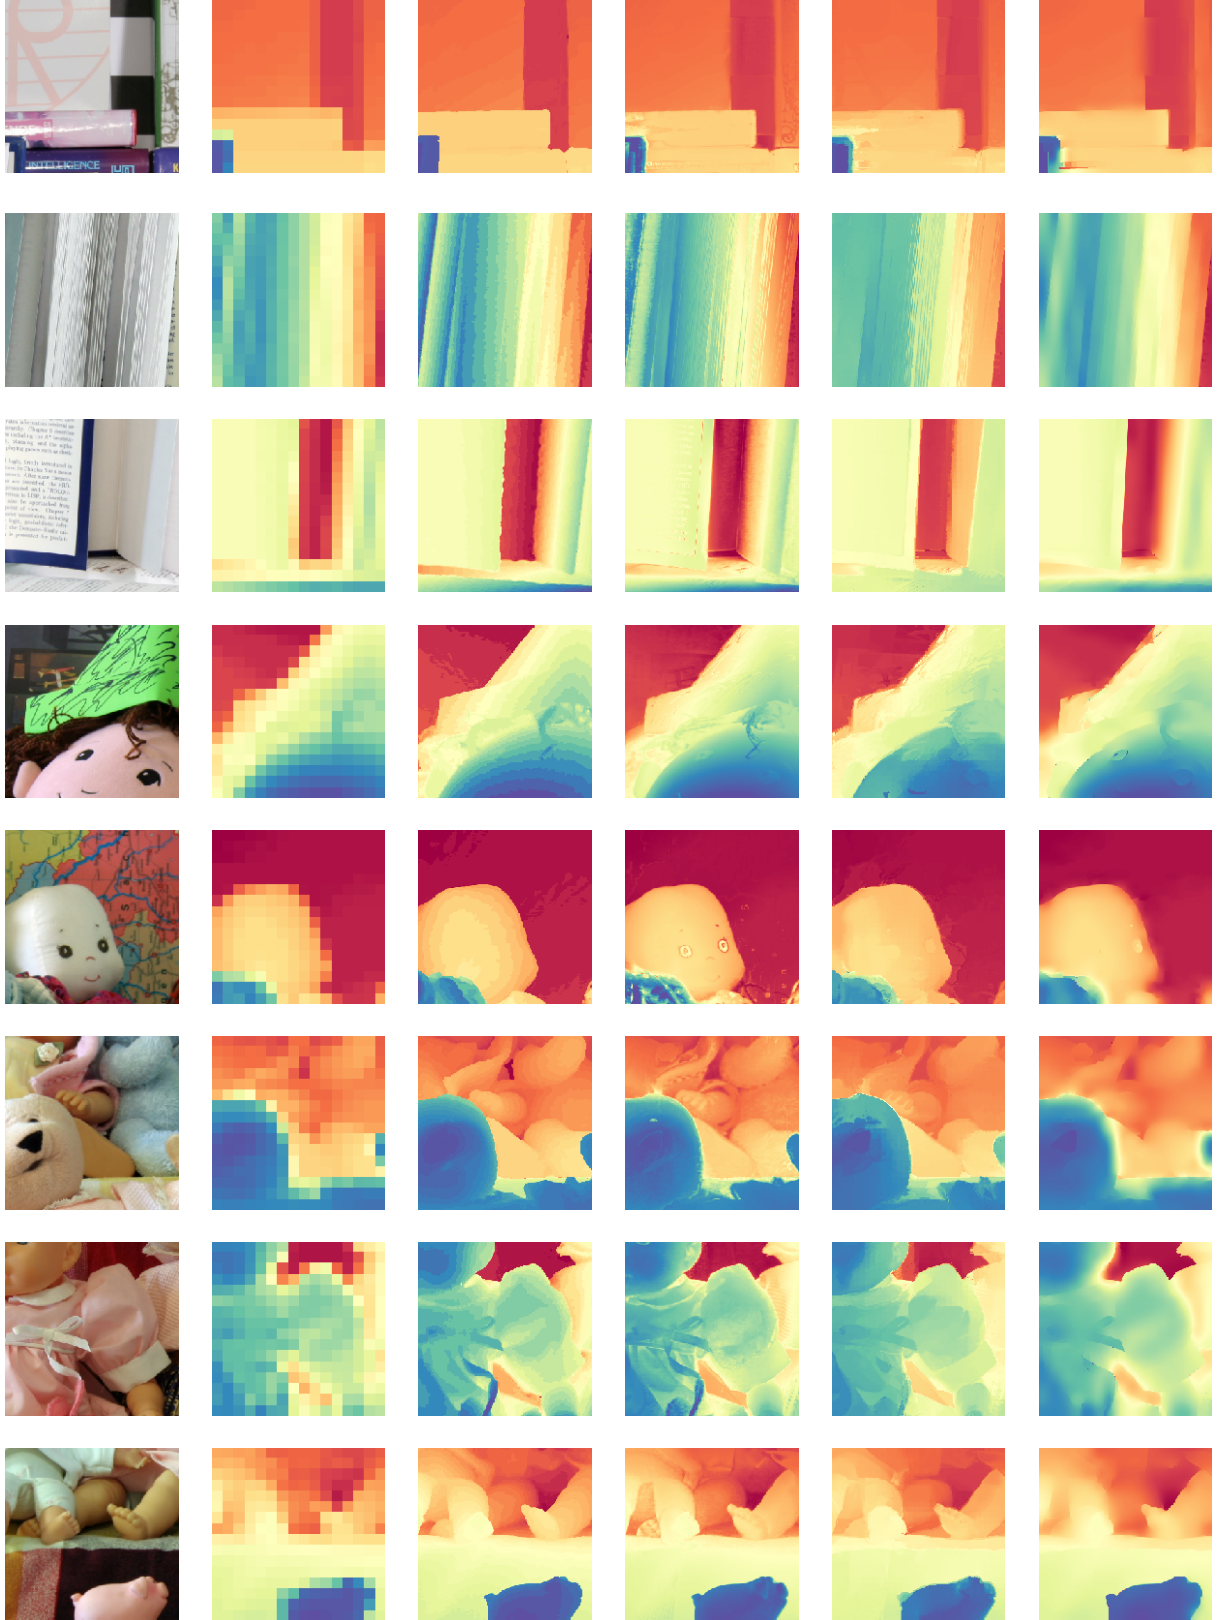

Figure 2: Additional results for the depth guided super-resolution (upsampling factor  $\times 16$ ). From left to right: guide image, source image, target image, our prediction, the FBS and the SD filter.

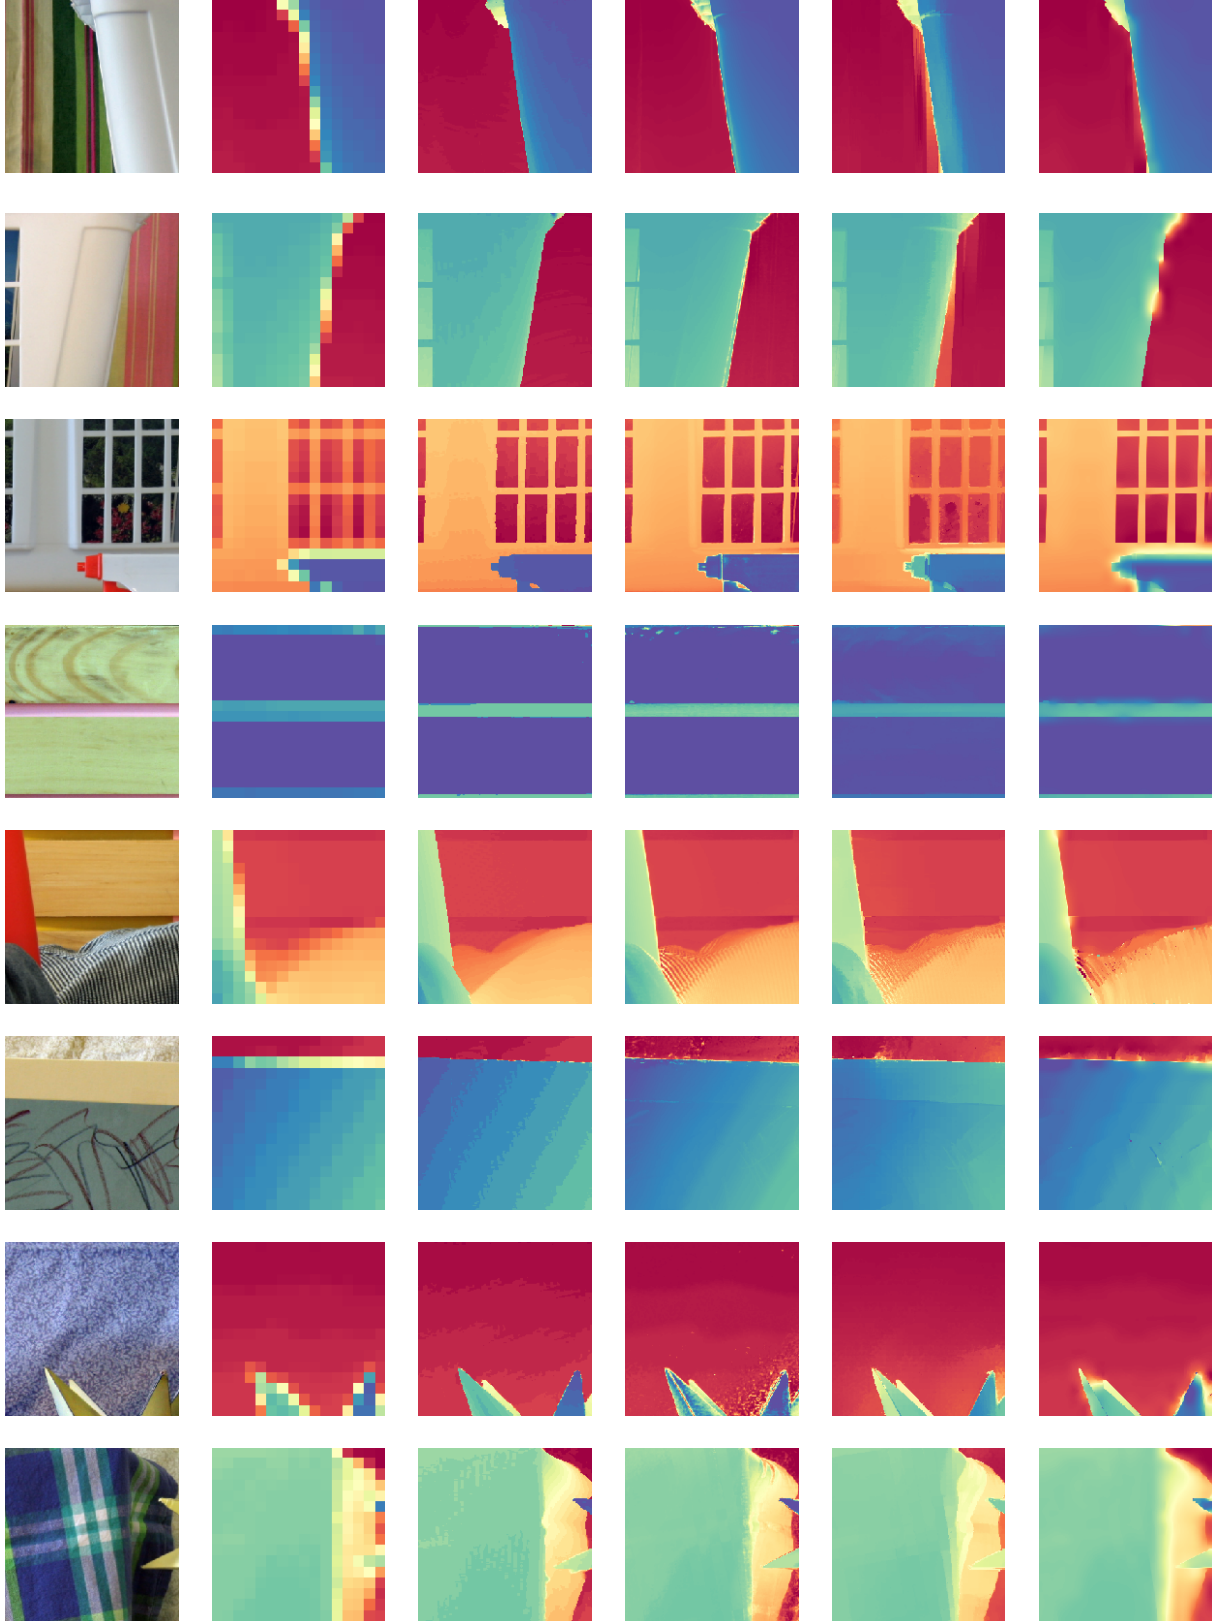

Figure 3: Additional results for the depth guided super-resolution (upsampling factor  $\times 16$ ). From left to right: guide image, source image, target image, our prediction, the FBS and the SD filter.

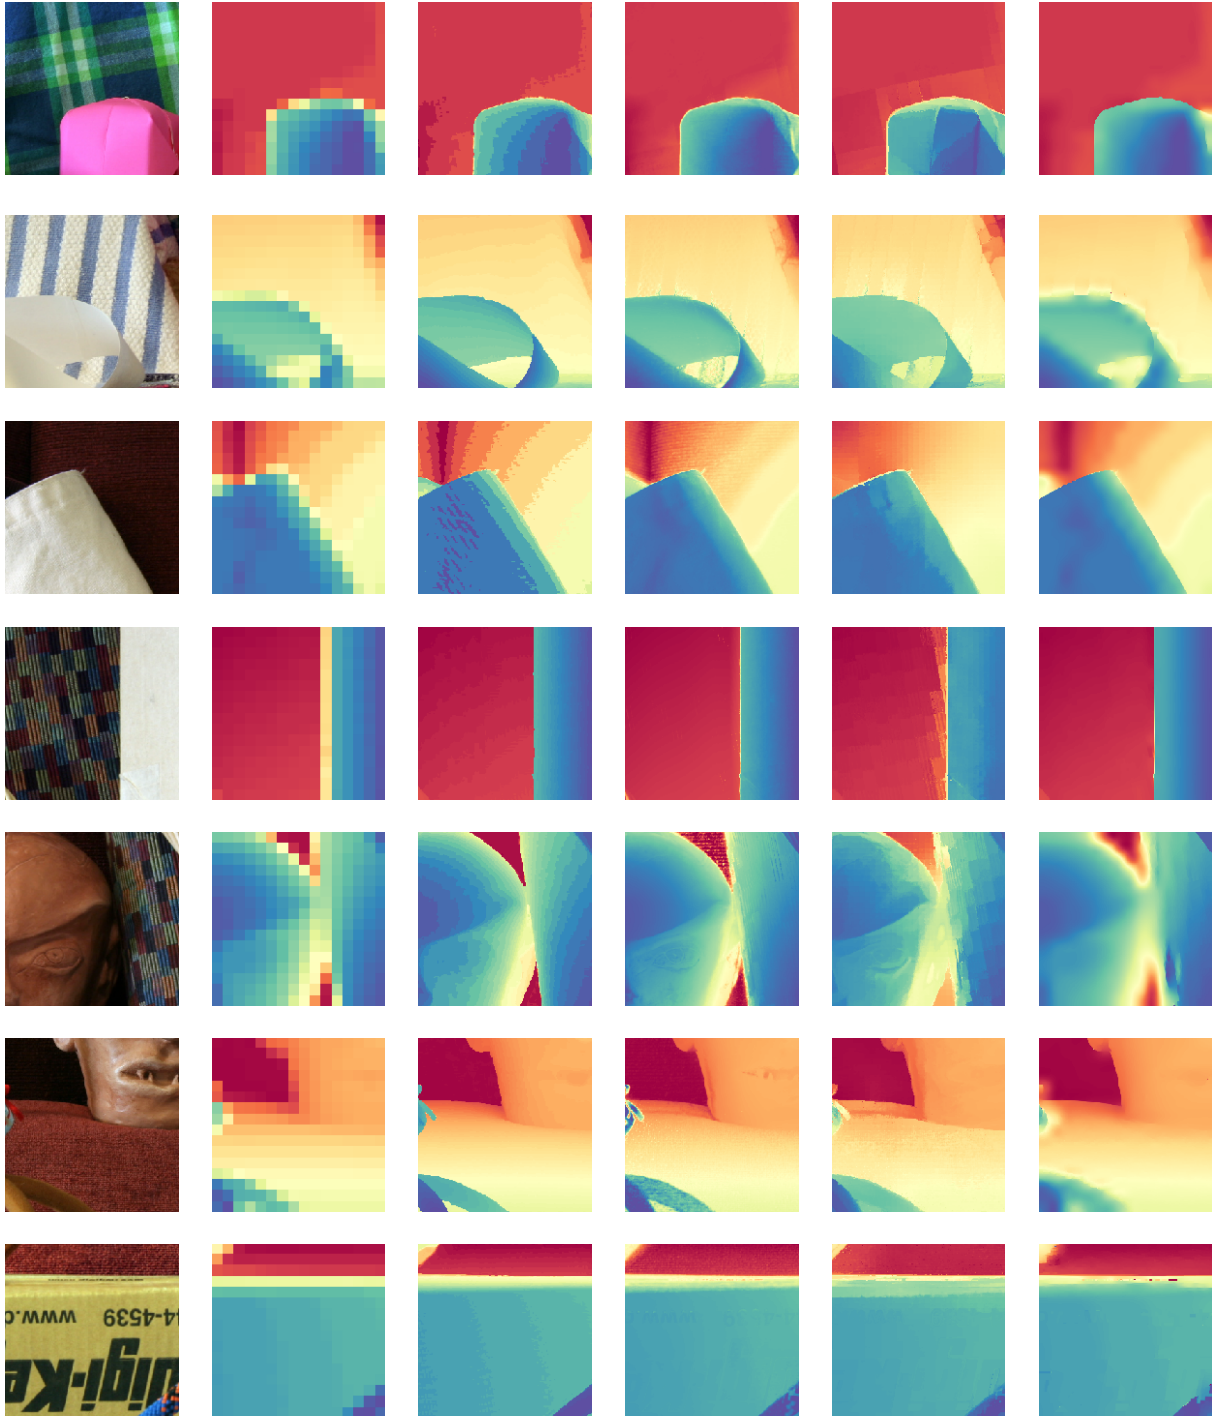

Figure 4: Additional results for the depth guided super-resolution (upsampling factor  $\times 16$ ). From left to right: guide image, source image, target image, our prediction, the FBS and the SD filter.
